# Supplementary material for: Comprehensive Transcriptome Analysis Reveals the Distinct Gene Expression Patterns of Tumor Microenvironment in HPV-Associated and HPV-Non Associated Tonsillar Squamous Cell Carcinoma
Source: MDPI journal article supplement (doi:10.3390/cancers15235548), 2023-11-23
Supplement: s1 [file s1]

# Supplementary Materials: Comprehensive Transcriptome Analysis Reveals the Distinct Gene Expression Patterns of Tumor Microenvironment in HPV-Associated and HPV-Non Associated Tonsillar Squamous Cell Carcinoma

Reham M. Alahmadi, Najat Marraiki, Mohammed Alswayyed, Hatim A. Khoja, Abdullah E. Al-Anazi, Rawan M. Alahmadi, Meshael M. Alkusayer, Bandar Alosaimi and Maaweya Awadalla

**Table S1.** UniGene, GenBank, Symbol and description of Genes.

| UniGene   | GenBank   | Symbol             | Description                                                                         |
|-----------|-----------|--------------------|-------------------------------------------------------------------------------------|
| Hs.431048 | NM_005157 | ABL1               | C-abl oncogene 1, non-receptor tyrosine kinase                                      |
| Hs.525622 | NM_005163 | AKT1               | V-akt murine thymoma viral oncogene homolog 1                                       |
| Hs.158932 | NM_000038 | APC                | Adenomatous polyposis coli                                                          |
| Hs.367437 | NM_000051 | ATM                | Ataxia telangiectasia mutated                                                       |
| Hs.624291 | NM_004324 | BAX                | BCL2-associated X protein                                                           |
| Hs.517461 | NM_004327 | BCR                | Breakpoint cluster region                                                           |
| Hs.34012  | NM_000059 | BRCA2              | Breast cancer 2, early onset                                                        |
| Hs.599762 | NM_001228 | CASP8              | Caspase 8, apoptosis-related cysteine peptidase                                     |
| Hs.461086 | NM_004360 | CDH1               | Cadherin 1, type 1, E-cadherin (epithelial)                                         |
| Hs.370771 | NM_000389 | CDKN1A             | Cyclin-dependent kinase inhibitor 1A (p21, Cip1)                                    |
| Hs.512599 | NM_000077 | CDKN2A             | Cyclin-dependent kinase inhibitor 2A (melanoma, p16, inhibits CDK4)                 |
| Hs.72901  | NM_004936 | CDKN2B             | Cyclin-dependent kinase inhibitor 2B (p15, inhibits CDK4)                           |
| Hs.654393 | NM_005225 | E2F1               | E2F transcription factor 1                                                          |
| Hs.181128 | NM_005229 | ELK1               | ELK1, member of ETS oncogene family                                                 |
| Hs.208124 | NM_000125 | ESR1               | Estrogen receptor 1                                                                 |
| Hs.369438 | NM_005238 | ETS1               | V-ets erythroblastosis virus E26 oncogene homolog 1 (avian)                         |
| Hs.728789 | NM_005252 | FOS                | FBJ murine osteosarcoma viral oncogene homolog                                      |
| Hs.396530 | NM_000601 | HGF                | Hepatocyte growth factor (hepapoietin A; scatter factor)                            |
| Hs.37003  | NM_005343 | HRAS               | V-Ha-ras Harvey rat sarcoma viral oncogene homolog                                  |
| Hs.656213 | NM_004972 | JAK2               | Janus kinase 2                                                                      |
| Hs.479754 | NM_000222 | KIT                | V-kit Hardy-Zuckerman 4 feline sarcoma viral oncogene homolog                       |
| Hs.632486 | NM_021960 | MCL1               | Myeloid cell leukemia sequence 1 (BCL2-related)                                     |
| Hs.484551 | NM_002392 | MDM2               | Mdm2 p53 binding protein homolog (mouse)                                            |
| Hs.533432 | NM_005372 | MOS                | V-mos Moloney murine sarcoma viral oncogene homolog                                 |
| Hs.654446 | NM_005375 | MYB                | V-myb myeloblastosis viral oncogene homolog (avian)                                 |
| Hs.202453 | NM_002467 | MYC                | V-myc myelocytomatosis viral oncogene homolog (avian)                               |
| Hs.25960  | NM_005378 | MYCN               | V-myc myelocytomatosis viral related oncogene, neuroblastoma derived (avian)        |
| Hs.113577 | NM_000267 | NF1                | Neurofibromin 1                                                                     |
| Hs.81328  | NM_020529 | NFKBIA             | Nuclear factor of kappa light polypeptide gene enhancer in B-cells inhibitor, alpha |
| Hs.486502 | NM_002524 | NRAS               | Neuroblastoma RAS viral (v-ras) oncogene homolog                                    |
| Hs.175343 | NM_002645 | PIK3C2A            | Phosphoinositide-3-kinase, class 2, alpha polypeptide                               |
| Hs.553498 | NM_006218 | PIK3CA             | Phosphoinositide-3-kinase, catalytic, alpha polypeptide                             |
| Hs.526464 | NM_033238 | PML                | Promyelocytic leukemia                                                              |
| Hs.531704 | NM_002737 | PRKCA              | Protein kinase C, alpha                                                             |
| Hs.159130 | NM_002880 | RAF1               | V-raf-1 murine leukemia viral oncogene homolog 1                                    |
| Hs.654583 | NM_000964 | RARA               | Retinoic acid receptor, alpha                                                       |
| Hs.476270 | NM_007182 | RASSF1             | Ras association (RalGDS/AF-6) domain family member 1                                |
| Hs.408528 | NM_000321 | RB1                | Retinoblastoma 1                                                                    |
| Hs.631886 | NM_002908 | REL                | V-rel reticuloendotheliosis viral oncogene homolog (avian)                          |
| Hs.350321 | NM_020630 | RET                | Ret proto-oncogene                                                                  |
| Hs.149261 | NM_001754 | RUNX1              | Runt-related transcription factor 1                                                 |
| Hs.654444 | NM_002961 | S100A4             | S100 calcium binding protein A4                                                     |
| Hs.55279  | NM_002639 | SERPINF5<br>Maspin | Serpin peptidase inhibitor, clade B (ovalbumin), member 5                           |
| Hs.515005 | NM_000455 | STK11              | Serine/threonine kinase 11                                                          |
| Hs.370854 | NM_000368 | TSC1               | Tuberous sclerosis 1                                                                |
| Hs.517792 | NM_000551 | VHL                | Von Hippel-Lindau tumor suppressor                                                  |
| Hs.461453 | NM_016373 | WWOX               | WW domain containing oxidoreductase                                                 |
| Hs.98493  | NM_006297 | XRCC1              | X-ray repair complementing defective repair in Chinese hamster cells 1              |
| Hs.471751 | NM_020311 | ACKR3              | Chemokine (C-X-C motif) receptor 7                                                  |

|           |              |        |                                                                                                           |
|-----------|--------------|--------|-----------------------------------------------------------------------------------------------------------|
| Hs.150749 | NM_000633    | BCL2   | B-cell CLL/lymphoma 2                                                                                     |
| Hs.143961 | NM_002988    | CCL18  | Chemokine (C-C motif) ligand 18 (pulmonary and activation-regulated)                                      |
| Hs.75498  | NM_004591    | CCL20  | Chemokine (C-C motif) ligand 20                                                                           |
| Hs.534347 | NM_002990    | CCL22  | Chemokine (C-C motif) ligand 22                                                                           |
| Hs.75703  | NM_002984    | CCL4   | Chemokine (C-C motif) ligand 4                                                                            |
| Hs.514821 | NM_002985    | CCL5   | Chemokine (C-C motif) ligand 5                                                                            |
| Hs.705362 | NM_001123396 | CCR2   | Chemokine (C-C motif) receptor 2                                                                          |
| Hs.370036 | NM_001838    | CCR7   | Chemokine (C-C motif) receptor 7                                                                          |
| Hs.521989 | NM_014143    | CD274  | CD274 molecule                                                                                            |
| Hs.1349   | NM_000758    | CSF2   | Colony stimulating factor 2 (granulocyte-macrophage)                                                      |
| Hs.2233   | NM_000759    | CSF3   | Colony stimulating factor 3 (granulocyte)                                                                 |
| Hs.247824 | NM_005214    | CTLA4  | Cytotoxic T-lymphocyte-associated protein 4                                                               |
| Hs.624    | NM_000584    | CXCL8  | Chemokine (C-X-C motif) ligand 8 (IL8)                                                                    |
| Hs.632586 | NM_001565    | CXCL10 | Chemokine (C-X-C motif) ligand 10                                                                         |
| Hs.522891 | NM_000609    | CXCL12 | Chemokine (C-X-C motif) ligand 12                                                                         |
| Hs.77367  | NM_002416    | CXCL9  | Chemokine (C-X-C motif) ligand 9                                                                          |
| Hs.846    | NM_001557    | CXCR2  | Chemokine (C-X-C motif) receptor 2                                                                        |
| Hs.605083 | NM_005228    | EGFR   | Epidermal growth factor receptor                                                                          |
| Hs.247700 | NM_014009    | FOXP3  | Forkhead box P3                                                                                           |
| Hs.62661  | NM_002053    | GBP1   | Guanylate binding protein 1, interferon-inducible                                                         |
| Hs.1051   | NM_004131    | GZMB   | Granzyme B (granzyme 2, cytotoxic T-lymphocyte-associated serine esterase 1)                              |
| Hs.719495 | NM_001530    | HIF1A  | Hypoxia inducible factor 1, alpha subunit (basic helix-loop-helix transcription factor)                   |
| Hs.713441 | NM_002116    | HLA-A  | Major histocompatibility complex, class I, A                                                              |
| Hs.77961  | NM_002117    | HLA-C  | Major histocompatibility complex, class I, C                                                              |
| Hs.856    | NM_000619    | IFNG   | Interferon, gamma                                                                                         |
| Hs.674    | NM_002187    | IL12B  | Interleukin 12B (natural killer cell stimulatory factor 2, cytotoxic lymphocyte maturation factor 2, p40) |
| Hs.845    | NM_002188    | IL13   | Interleukin 13                                                                                            |
| Hs.602618 | NM_000585    | IL15   | Interleukin 15                                                                                            |
| Hs.1722   | NM_000575    | IL1A   | Interleukin 1, alpha                                                                                      |
| Hs.591803 | NM_016584    | IL23A  | Interleukin 23, alpha subunit p19                                                                         |
| Hs.73917  | NM_000589    | IL4    | Interleukin 4                                                                                             |
| Hs.654458 | NM_000600    | IL6    | Interleukin 6 (interferon, beta 2)                                                                        |
| Hs.407995 | NM_002415    | MIF    | Macrophage migration inhibitory factor (glycosylation-inhibiting factor)                                  |
| Hs.202453 | NM_002467    | MYC    | V-myc myelocytomatosis viral oncogene homolog (avian)                                                     |
| Hs.82116  | NM_002468    | MYD88  | Myeloid differentiation primary response gene (88)                                                        |
| Hs.313    | NM_000582    | SPP1   | Secreted phosphoprotein 1                                                                                 |
| Hs.519033 | NM_003264    | TLR2   | Toll-like receptor 2                                                                                      |
| Hs.241570 | NM_000594    | TNF    | Tumor necrosis factor                                                                                     |
| Hs.73793  | NM_003376    | VEGFA  | Vascular endothelial growth factor A                                                                      |

**Table S2.** PCR primers used for HPV genotyping and oncogenes integration detection.

| Primer | Specificity | Sequence (5' to 3')      |
|--------|-------------|--------------------------|
| HPV16  | F16E7       | TCAGAGGAGGAGGATGAAATAGA  |
|        | R16E7       | GCACAACCGAAGCGTAGA       |
|        | F16E6       | AATGTTTCAGGACCCACAGG     |
|        | R16E6       | GTTGCTTGCACTACACACATTC   |
| HPV18  | F18E1       | CATTTTGTGAACAGGCAGAGC    |
|        | R18E1       | ACTTGTGCATCATTGTGGACC    |
|        | F18E6       | ACCCTACAAGCTACCTGATCT    |
|        | R18E6       | ACCTCTGTAAGTTCCAATACTGTC |
|        | F18E7       | AATTCCGGTTGACCTTCTATGT   |
|        | R18E7       | GGCTGGTAAATGTTGATGAT     |
| HPV31  | F31E6       | ACGATTCCACAACATAGGAGGA   |
|        | R31E6       | TACACTTGGGTTTCAGTACGAGGT |
| HPV33  | F33L1       | CGTCGCAGGCGTAAACG        |
|        | R33/etcl.1  | ACAGGAGGCAGGTACAC        |
| HPV35  | F35E4       | GCCTGCTCCGTGGGC          |
|        | R35E4       | GCACTGAGTCGCACTCGC       |
| HPV39  | F39E7       | CGAGCAATTAGGAGAGTCAGAGG  |
|        | R39E7       | TGTGTGACGCTGTGGTTCAT     |
| HPV45  | F18E1       | CATTTTGTGAACAGGCAGAGC    |
|        | R45E1       | CAACACCTGTGCATCATTCTGA   |

|              |            |                        |
|--------------|------------|------------------------|
| <b>HPV58</b> | F58L1      | GCGTCGCAGACGTAAACG     |
|              | R33/etcI.1 | ACAGGAGGCAGGTACAC      |
| <b>HMBS</b>  | F HMBS     | GCCTGCAGTTTGAAATCAGTG  |
|              | R HMBS     | CGGGACGGGCTTTAGCTA     |
| <b>GAPDH</b> | F GAPDH    | GTATTGGGCGCCTGGTCACC   |
|              | R GAPDH    | CGCTCCTGGAAGATGGTGATGG |
